# Supplementary material
Source: ML conference proceedings conference paper supplement (https://proceedings.mlr.press/v216/song23a.html)
Supplement: Supplementary file 1 [file song23a-supp.pdf]

---

# ViBid: Linear Vision Transformer with Bidirectional Normalization (Supplementary Material)

---

Jeonggeun Song<sup>1,\*</sup>

Heung-Chang Lee<sup>1,\*</sup>

<sup>1</sup>AI Lab & Service, Kakao Enterprise, Seongnam-si, South Korea

\*Equal Contributions

Table 1: **Hyperparameter settings for our various models on ImageNet1k dataset.** Values in parentheses "(") mean values used in fine-tuning.

| Hyperparameter   | ViBid-U         | ViBid-T | ViBid-S | ViBid-M     | ViBid-B       |
|------------------|-----------------|---------|---------|-------------|---------------|
| Learning rate    | 5e-5            |         |         | 4e-5 (0.01) |               |
| Warm-up LR       | 1e-6 (None)     |         |         |             |               |
| Batch size       | 4096 (4096)     |         |         |             |               |
| Optimizer        | AdamW (SGD)     |         |         |             |               |
| LR scheduler     | Cosine (Cosine) |         |         |             |               |
| Gradient clip    | 0.5 (0.5)       |         |         |             |               |
| Stochastic depth | 0.0             | 0.05    | 0.1     | 0.15 (0.15) | 0.25 (0.25)   |
| Warm-up epochs   | 5 (0)           |         |         |             |               |
| RandAugment      | 2, 7            |         |         | 2, 9 (2, 9) | 2, 12 (2, 12) |
| Label smoothing  | 0.1 (0.1)       |         |         |             |               |
| Train epochs     | 400 (10)        |         |         |             |               |
| Weight decay     | 0.05 (0.0)      |         |         |             |               |

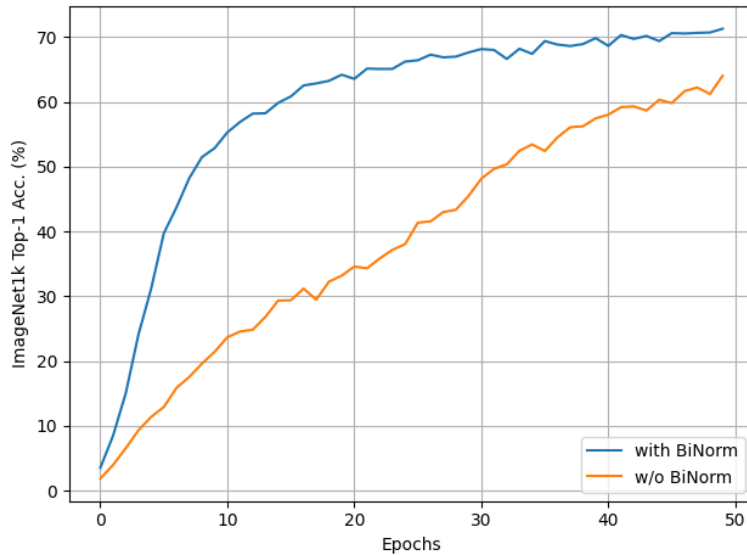

Figure 1: **Comparison of the effects of BiNorm presence or absence on early epoch training by using ViBid-M.** See Section 3 for details.

---

**Algorithm 1:** Python style pseudo-code of BiNorm-based attention.

---

```
1 def attend(self, x):
2     b, n, d = x.shape
3     qkv = self.qkv_proj(x)
4     h = qkv.shape[-1] // 3
5     qkv = qkv.reshape(b, n, 3, self.num_heads, h // self.num_heads)
6     qkv = qkv.permute(2, 0, 3, 1, 4)
7
8     q = output[0]
9     k = output[1]
10    v = output[2]
11
12    # we commented the lines of the original SA
13    # output = (q @ k.transpose(-2, -1)) * self.scale
14    # output = output.softmax(dim=-1)
15    output = k.transpose(-2, -1) @ v
16    output = normalize(output, dim=-2)
17    q = normalize(q, dim=-1) # BiNorm
18
19    # output = (output @ v).transpose(1, 2).reshape(b, n, h)
20    output = (q @ output).reshape(b, n, h)
21    output = self.proj(output)
22    return output
```

---

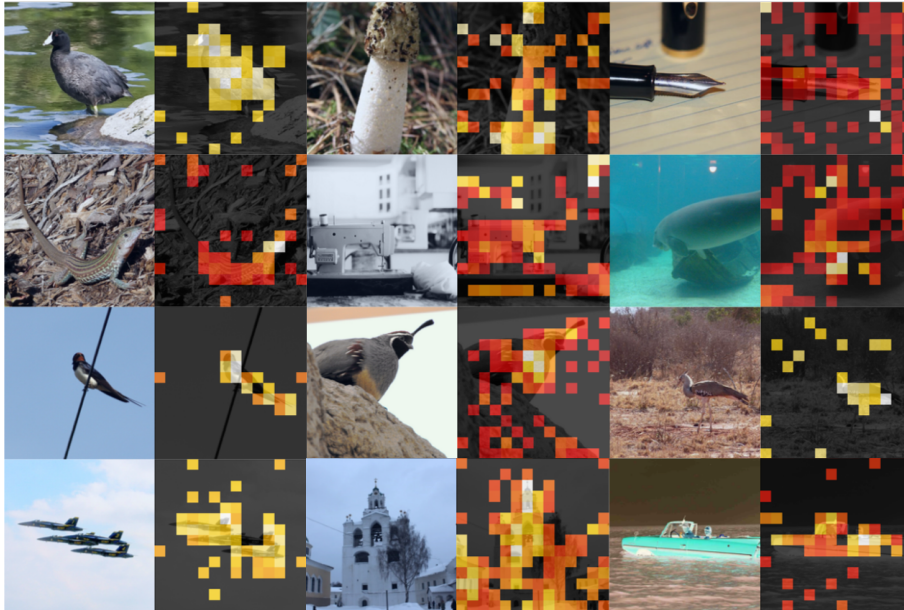

Figure 2: **Visualized attentions.** Visualization of attention matrices using pseudo-inverse scheme. These matrices are extracted from class attention module of pretrained ViBid-S.
